# Supplementary material for: Driving and limiting factors of CH 4 and CO 2 emissions from coastal brackish-water wetlands in temperate regions
Source: Copernicus journal article supplement (doi:10.5194/egusphere-2023-605), 2023-04-04
Supplement: Supplementary file 1 [file egusphere-2023-605-supplement.pdf]

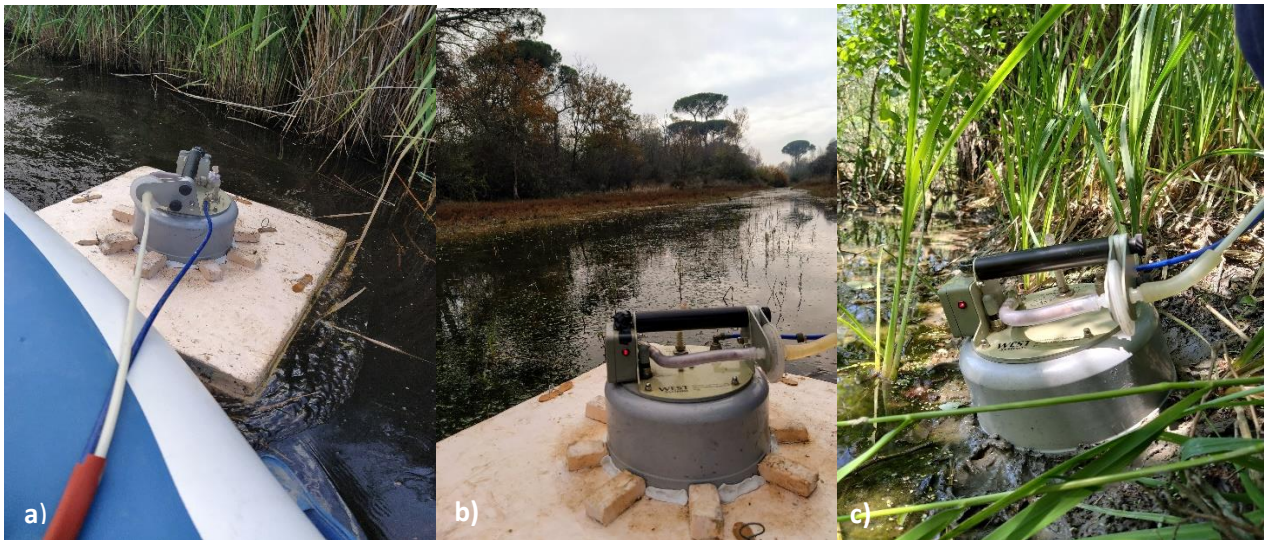

Fig. S1 - Measuring GHGs fluxes with accumulation chamber on (a) deep and (b) shallow water with floating devise, and on (c) flooded soils.

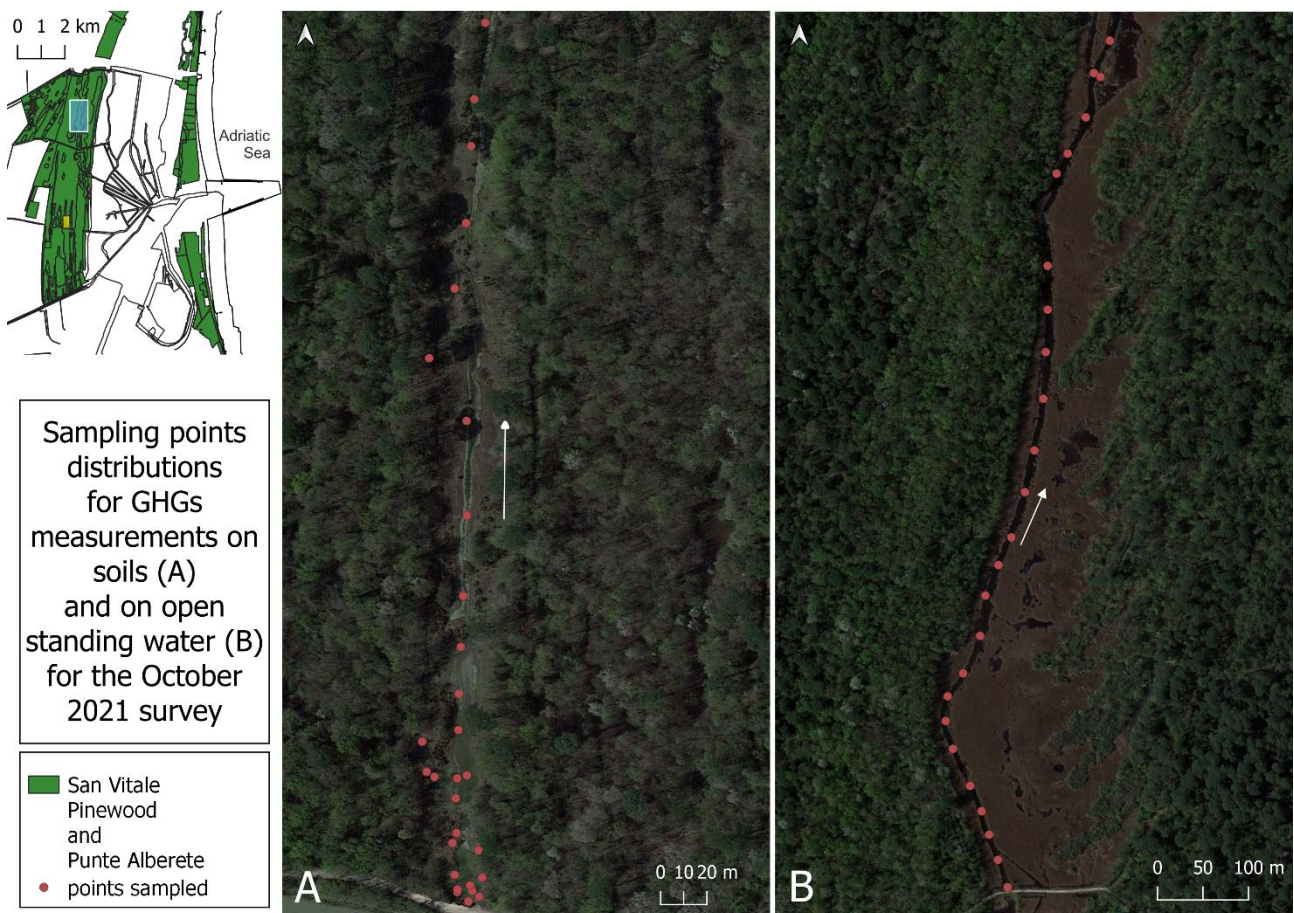

Fig. S2 – Example of distribution of points measurements in both type of sampling: soil (a) and open standing water (b).

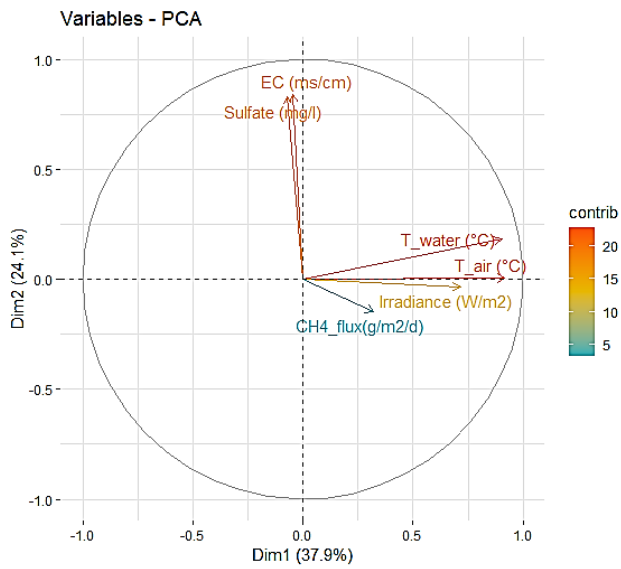

Fig. S3 - Variable correlation plot with related contributions for the PCA of CH<sub>4</sub> fluxes.

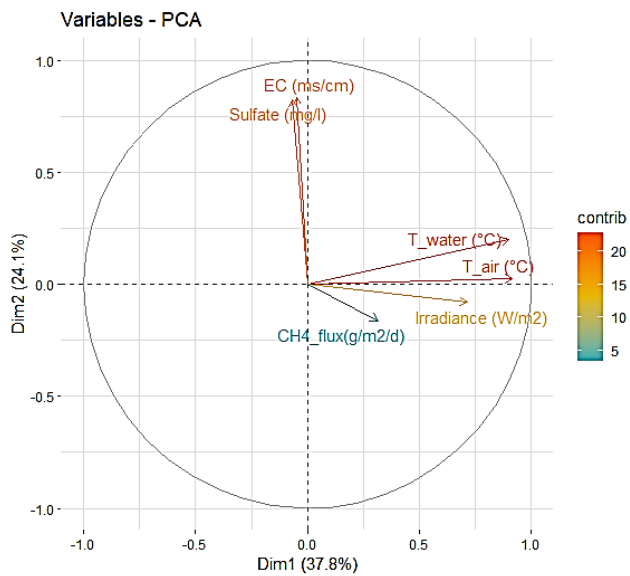

Fig. S4 - Variable correlation plot with related contributions for the PCA of CO<sub>2</sub> fluxes.

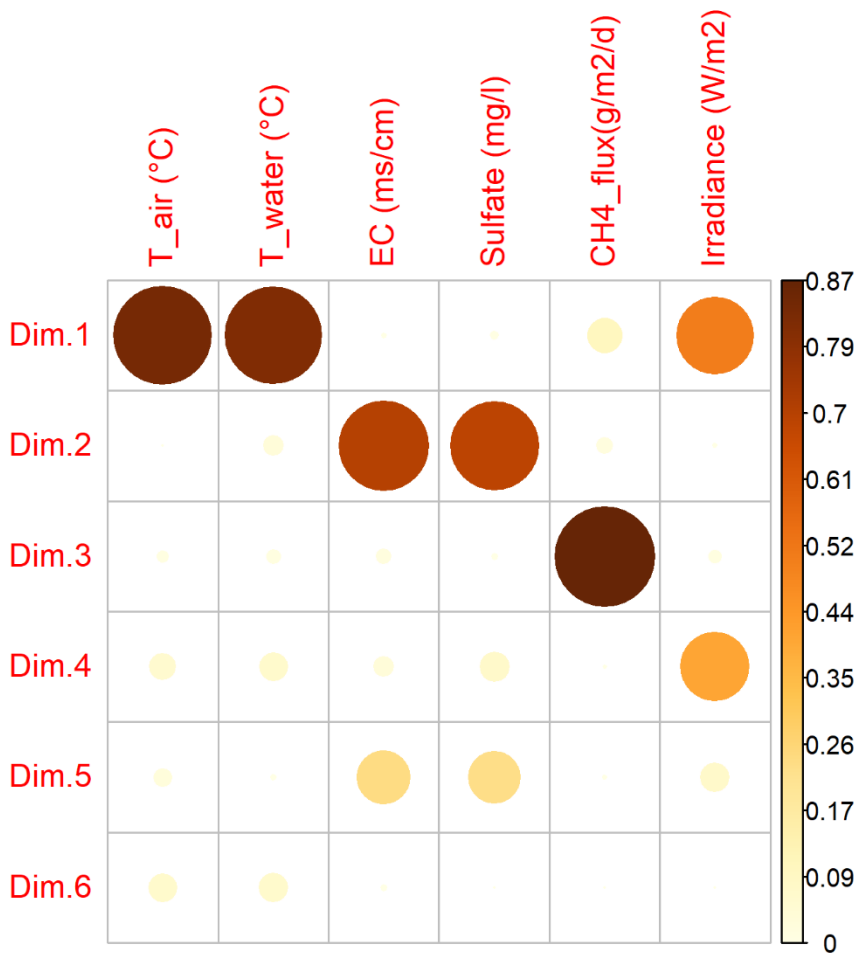

Fig. S5 - Correlation matrix between variables and PC for CH<sub>4</sub> fluxes

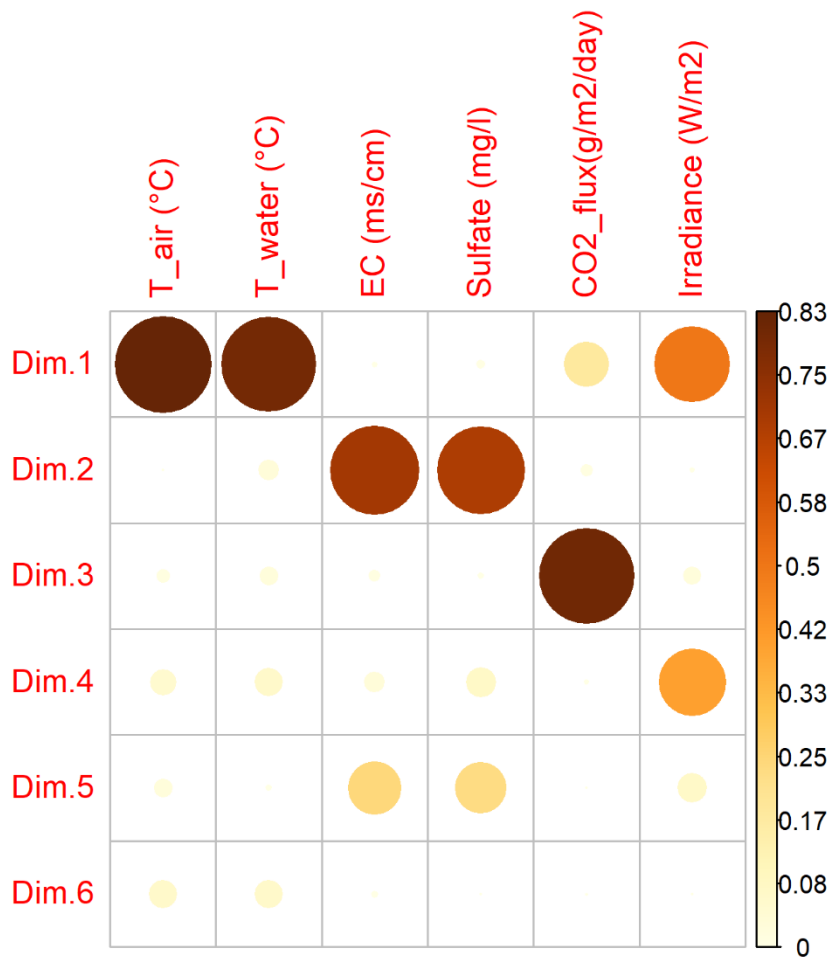

Fig. S6 - Correlation matrix between variables and PC for CO<sub>2</sub> fluxes

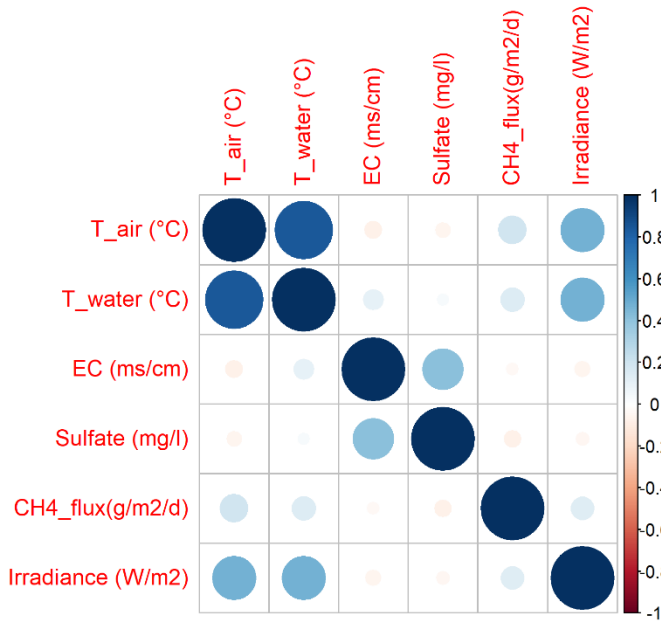

Fig. S7 – Correlation matrix with Pearson's correlation for CH<sub>4</sub> fluxes and environmental variables

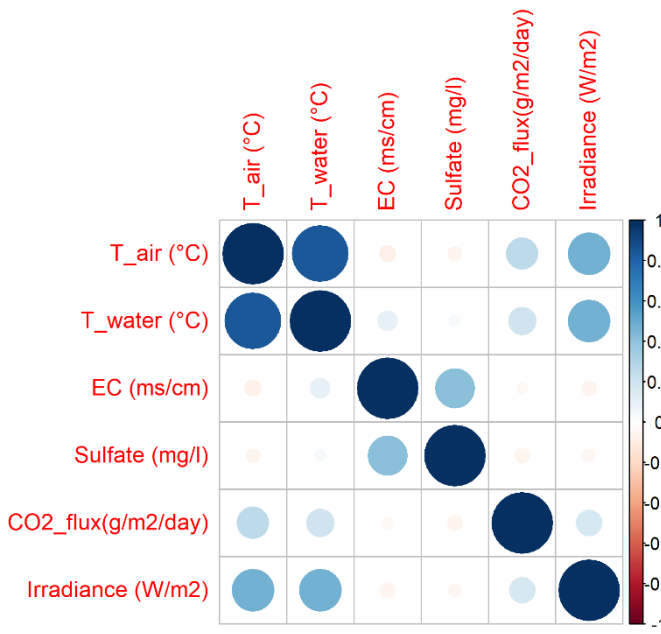

Fig. S8 - Correlation matrix with Pearson's correlation for CO<sub>2</sub> fluxes and environmental variables

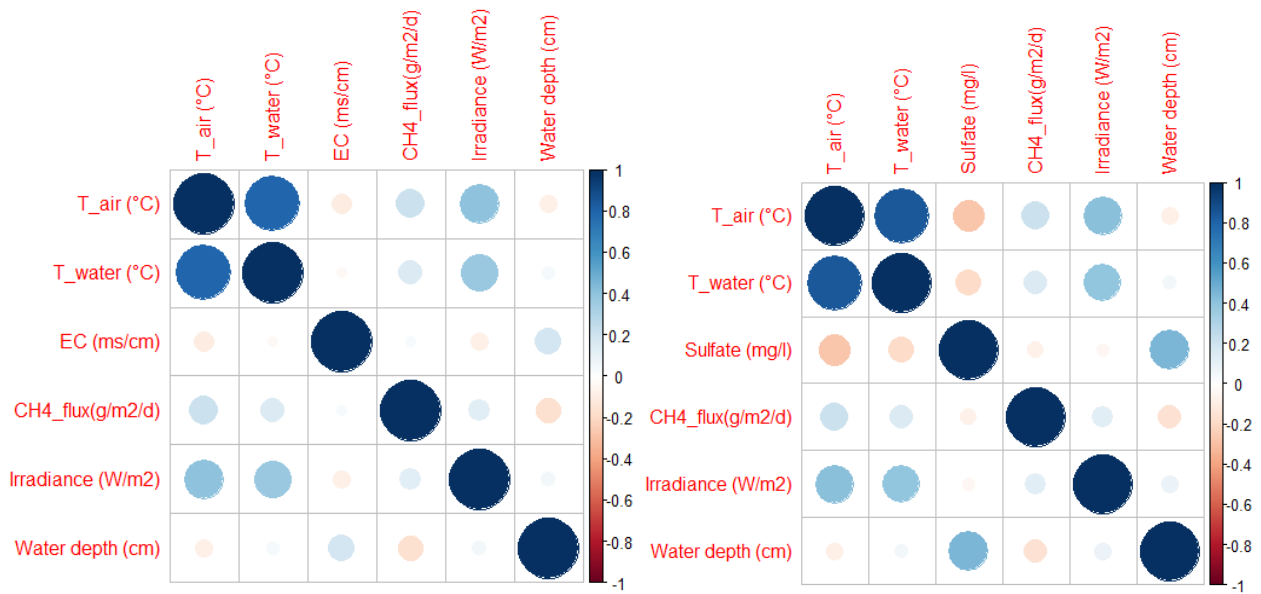

Fig. S9 - Correlation matrix with Pearson's correlation for CH<sub>4</sub> fluxes in flooded areas and EC (a), and SO<sub>4</sub><sup>2-</sup> (b)

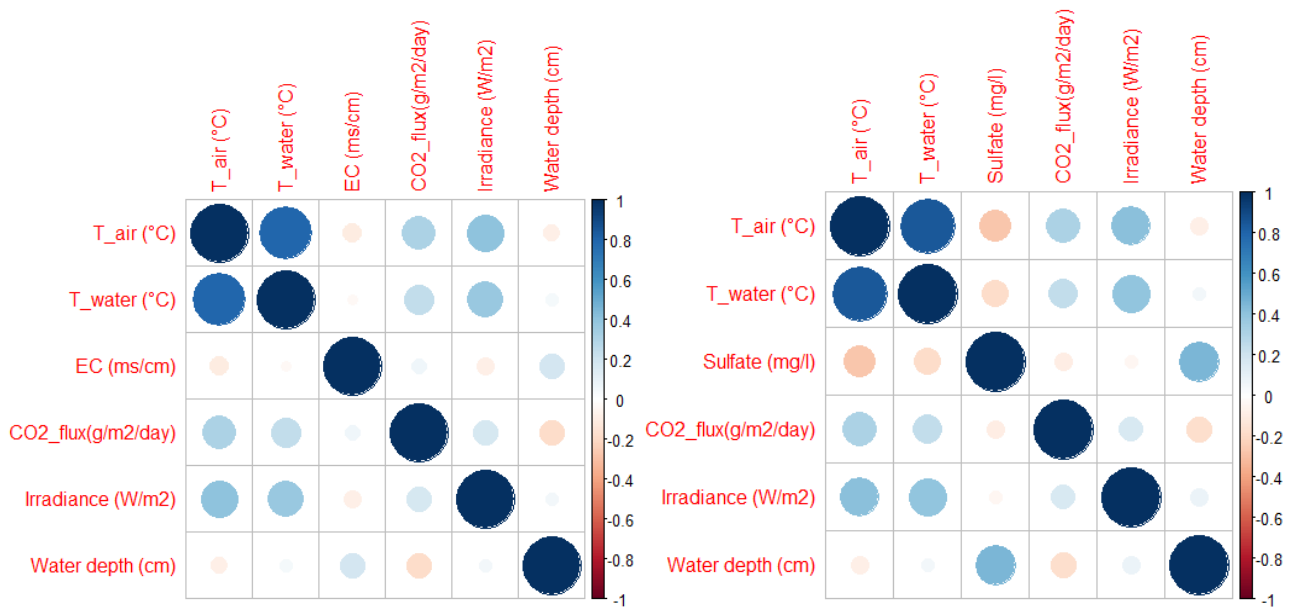

Fig. S10 - Correlation matrix with Pearson's correlation for CO<sub>2</sub> fluxes in flooded areas and EC (a), and SO<sub>4</sub><sup>2-</sup> (b)

## Mann-Whitney test

$W_{\text{Mann-Whitney}} = 3429.00$ ,  $p = 4.66e-06$ ,  $\hat{r}_{\text{biserial}}^{\text{rank}} = 0.46$ ,  $CI_{95\%} [0.29, 0.60]$ ,  $n_{\text{obs}} =$

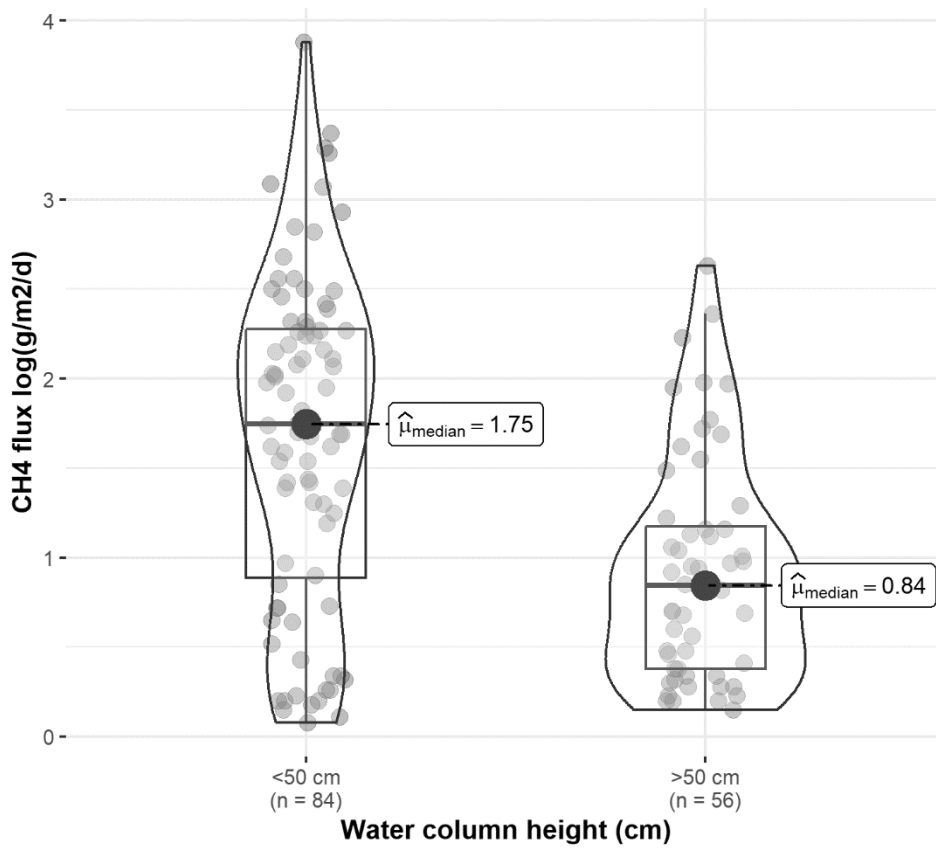

Fig. S11 - Mann Whitney test performed between CH<sub>4</sub> measurements from open waters with inundation levels <50 cm and >50cm. The two group are statistically different (\*\*\*) with a  $p = 4.66 e^{-06}$

## Mann-Whitney test

$W_{\text{Mann-Whitney}} = 15271.50$ ,  $p = 0.82$ ,  $\hat{r}_{\text{biserial}}^{\text{rank}} = -0.01$ ,  $CI_{95\%} [-0.13, 0.11]$ ,  $n_{\text{obs}} = 3$

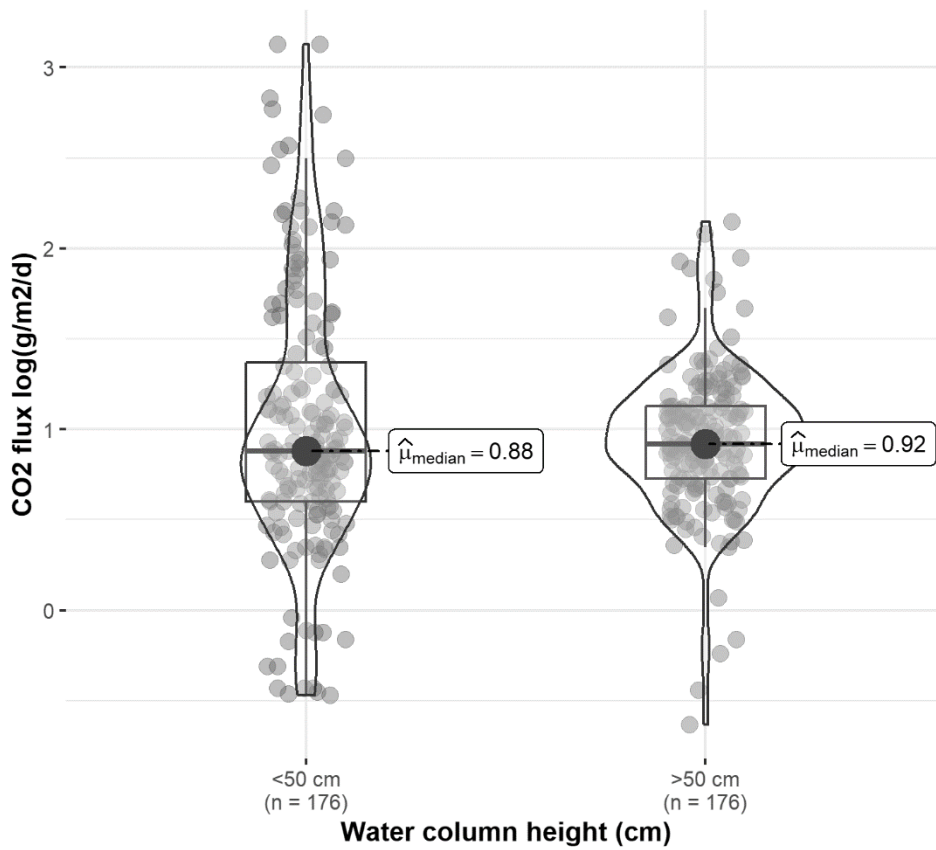

Fig. S12 - Mann Whitney test performed between CO<sub>2</sub> measurements from open waters with inundation levels <50 cm and >50cm. The two group are not statistically different with a  $p = 0.82$ .
